# Supplementary material for: TGF-β in the microenvironment induces a physiologically occurring immune-suppressive senescent state
Source: PubMed Central journal article supplement — Cell Rep. Author manuscript; Available in PMC 2023 May 16. (PMC10187541; doi:10.1016/j.celrep.2023.112129), 2023-02-22

**Supplemental information**

**TGF- $\beta$  in the microenvironment**

**induces a physiologically occurring**

**immune-suppressive senescent state**

**Satoru Matsuda, Ajinkya Revandkar, Taronish D. Dubash, Arvind Ravi, Ben S. Wittner, Maoxuan Lin, Robert Morris, Risa Burr, Hongshan Guo, Karsen Seeger, Annamaria Szabolcs, Dante Che, Linda Nieman, Gad A. Getz, David T. Ting, Michael S. Lawrence, Justin Gainor, Daniel A. Haber, and Shyamala Maheswaran**

## SUPPLEMENTAL TABLES

**Table S1: The full description of the set of leading-edge genes related to the cellular processes shown in Figure 2A, and Figure S3A.**

| #  | Signatures                       | GO         |
|----|----------------------------------|------------|
| 1  | DNA_REPLICATION_INITIATION       | GO:0006270 |
| 2  | DNA_REPLICATION                  | GO:0006260 |
| 3  | CELL_CYCLE_G1_S_PHASE_TRANSITION | GO:0044843 |
| 4  | CELL_CYCLE                       | GO:0007049 |
| 5  | DNA_DEPENDENT_DNA_REPLICATION    | GO:0006261 |
| 6  | DNA_METABOLIC_PROCESS            | GO:0006259 |
| 7  | CELL_CYCLE_PROCESS               | GO:0022402 |
| 8  | CELL_CYCLE_PHASE_TRANSITION      | GO:0044770 |
| 9  | CHROMOSOME                       | GO:0005694 |
| 10 | MITOTIC_CELL_CYCLE               | GO:0000278 |
| 11 | CHROMOSOMAL_REGION               | GO:0098687 |
| 12 | CHROMOSOME_ORGANIZATION          | GO:0051276 |

**Table S2: Characteristics of NSCLC patients treated with immune checkpoint inhibitors, related to use biological samples in STAR METHODS. See also Figure 5 and S6.**

|            | Patient_Age_at_Diagnosis | Patient_Sex | Initial_Stage | Agent_PD1                 |
|------------|--------------------------|-------------|---------------|---------------------------|
| Patient 1  | 58                       | M           | 4             | Nivolumab                 |
| Patient 2  | 58                       | F           | 4             | Nivolumab                 |
| Patient 3  | 75                       | M           | 3             | Nivolumab                 |
| Patient 4  | 52                       | F           | 4             | Nivolumab                 |
| Patient 5  | 54                       | M           | 3             | Nivolumab                 |
| Patient 6  | 79                       | M           | 1             | Nivolumab                 |
| Patient 7  | 75                       | M           | 4             | Nivolumab                 |
| Patient 8  | 71                       | M           | 3             | Nivolumab                 |
| Patient 9  | 78                       | M           | 3             | Nivolumab                 |
| Patient 10 | 73                       | M           | 3             | Pembrolizumab             |
| Patient 11 | 71                       | M           | 1             | Nivolumab                 |
| Patient 12 | 62                       | M           | 3             | Nivolumab                 |
| Patient 13 | 75                       | M           | 3             | Atezolizumab              |
| Patient 14 | 68                       | M           | 4             | Nivolumab                 |
| Patient 15 | 60                       | F           | 4             | Nivolumab                 |
| Patient 16 | 66                       | M           | 1             | Atezolizumab              |
| Patient 17 | 57                       | F           | 3             | Nivolumab                 |
| Patient 18 | 75                       | F           | 4             | Pembrolizumab             |
| Patient 19 | 78                       | M           | 3             | Nivolumab                 |
| Patient 20 | 58                       | F           | 2             | Nivolumab                 |
| Patient 21 | 70                       | F           | 4             | Pembrolizumab             |
| Patient 22 | 81                       | M           | 1             | Nivolumab +<br>Ipilimumab |
| Patient 23 | 65                       | F           | 1             | Nivolumab +<br>Ipilimumab |
| Patient 24 | 48                       | F           | 2             | Nivolumab                 |
| Patient 25 | 64                       | F           | 4             | Nivolumab                 |
| Patient 26 | 47                       | F           | 4             | Nivolumab                 |
| Patient 27 | 63                       | F           | 4             | Nivolumab                 |
| Patient 28 | 52                       | F           | 4             | Pembrolizumab             |
| Patient 29 | 50                       | F           | 1             | Pembrolizumab             |
| Patient 30 | 64                       | F           | 4             | Pembrolizumab             |
| Patient 31 | 80                       | M           | 4             | Nivolumab +<br>Ipilimumab |
| Patient 32 | 78                       | F           | 4             | Atezolizumab              |
| Patient 33 | 66                       | F           | 4             | Pembrolizumab             |
| Patient 34 | 62                       | M           | 3             | Nivolumab                 |
| Patient 35 | 57                       | F           | 4             | Nivolumab +<br>Ipilimumab |
| Patient 36 | 79                       | M           | NA            | Pembrolizumab             |

|            |    |   |    |               |
|------------|----|---|----|---------------|
| Patient 37 | 65 | M | 4  | Nivolumab     |
| Patient 38 | 68 | F | 4  | Pembrolizumab |
| Patient 39 | 63 | M | 4  | Atezolizumab  |
| Patient 40 | 76 | F | 4  | Atezolizumab  |
| Patient 41 | 68 | M | 3  | Pembrolizumab |
| Patient 42 | 62 | F | 4  | Pembrolizumab |
| Patient 43 | 55 | F | NA | Pembrolizumab |
| Patient 44 | 65 | F | 3  | Atezolizumab  |



**Table S3: List of primers used for Real-time PCR reactions, related to oligonucleotides in STAR METHODS. See also Figure 6.**

| Gene       | Forward                 | Reverse                 |
|------------|-------------------------|-------------------------|
| E2F1       | CATCCCAGGAGGTCACCTTCTG  | GACAACAGCGGTTCTTGCTC    |
| E2F2       | CGTCCCTGAGTTCCCAACC     | GCGAAGTGTCATACCGAGTCTT  |
| E2F3       | AGAAAGCGGTCATCAGTACCT   | TGGACTTCGTAGTGCAGCTCT   |
| CCL        | GCTGCTTTCAGCATCCAAGTG   | CCAGGGACACCGACTACTG     |
| SLC2A1     | CAGTTCGGCTATAAACTGGTG   | GCCCCGACAGAGAAGATG      |
| TNFRSF11B  | ACCCAGAAACTGGTCATCAGC   | CTGCAATACACACACTCATCACT |
| GREM1      | CTGGGGACCCTACTGCCAA     | TTTGCACCAATCTCGCTTCAG   |
| CCL5       | GCTGCTTTGCCTACCTCTCC    | TCGAGTGACAAACACGACTGC   |
| SCG2       | GCTAAGGCGTACCGACTTGG    | TTCGGCTCCAGAGATGAGGAA   |
| INHBA      | TGAGAGGATTTCTGTTGGCAAG  | TGACATCGGGTCTCTTCTTCA   |
| INHA       | CCTTTTGCTGTTGACCCTACG   | AGGCATCTAGGAATAGAGCCTTC |
| CSF2       | GGCCTTGGAAGCATGTAGAGG   | GGAGAACTCGTTAGAGACGACTT |
| IL1A       | CGAAGACTACAGTTCTGCCATT  | GACGTTTCAGAGGTTCTCAGAG  |
| IL1B       | GCAACTGTTCTGAACTCAACT   | ATCTTTTGGGGTCCGTCAACT   |
| CCL2       | TTAAAAACCTGGATCGGAACCAA | GCATTAGCTTCAGATTTACGGGT |
| CMTM3      | GCCGAGTCGGGTCTTTCATTC   | GAGGAAGTAAACGGCCAACAG   |
| E-cadherin | GGTTTTCTACAGCATCACCG    | GCTTCCCCATTTGATGACAC    |

## SUPPLEMENTAL FIGURE LEGENDS

### Figure S1. TGF $\beta$ induces senescence in normoxic and hypoxic cells

(A) Hypoxia-inducible genes are elevated in cells cultured under 4% oxygen. Protein samples from A549 cells grown under normoxia (20% O<sub>2</sub>) or hypoxia (4% O<sub>2</sub>) were analyzed for the expression of hypoxia inducible genes. Bar graph shows elevated expression of hypoxia inducible targets in hypoxic A549 cells. (n=3 biological replicates); Bar graph shows Mean $\pm$ SD; Asterisks represent p<0.001 by two-tailed unpaired Student's t-test.

(B)  $\beta$ -gal activity in TGF $\beta$ -treated normoxic and hypoxic cells increases over time. A549 cells treated with 5 ng/ml TGF $\beta$  for 0, 3, 9, 15 and 21 days were stained and sorted for  $\beta$ -gal activity. The bar graph showing the percentage of  $\beta$ -gal positive cells for each condition and represents Mean $\pm$ SD for each condition. (n=3 biological replicates). Asterisk represents p<0.05 by Mann-Whitney U test.

(C) TGF $\beta$  increases  $\beta$ -gal positivity in HepG2 and TE4 cells. The bar graphs show the percentage of  $\beta$ -gal positive cells for each condition (5 ng/ml TGF $\beta$ ; 15 days) and represent Mean $\pm$ SD for each condition. (n=3 biological replicates). Asterisk represents p<0.05 by Mann-Whitney U test.

(D) TGF $\beta$  induces the senescence marker, H3K9Me3, in normoxic and hypoxic cells. Upper panel shows H3K9Me3 staining of untreated and TGF $\beta$ -treated A549 cells grown under hypoxia and normoxia (5ng/ml TGF $\beta$ ; 15 days). Scale bar: 20 $\mu$ m. Lower panel: western blot of H3K9Me3 protein expression in A549 cells treated with TGF $\beta$  for 0, 3 and 15 days. GAPDH was used as control. Representative data from two biological replicates.

(E) TGF $\beta$  does not induce apoptosis in normoxic and hypoxic cells. A549 cells grown under normoxia or hypoxia were treated with 5 ng/ml TGF $\beta$  for 0 and 15 days and stained with an APC conjugated Annexin V antibody followed by FACS. A549 cells treated with docetaxel for 5 hours were used as control (left most bar). Bar graph shows relative intensity of Annexin V determined by FACS. Untreated normoxic and hypoxic cells were used as control. n=3 biological replicates.

(F) p21 expression in  $\beta$ -gal-low,  $\beta$ -gal-medium and  $\beta$ -gal-high populations sorted from A549 cells treated with TGF $\beta$  (5 ng/ml, 15 days). Untreated cells are shown as controls. Quantification of p21 band intensities is provided below. p21 expression in untreated normoxic cells was set at 1. GAPDH was used as control. Representative data from two biological replicates.

### **Figure S2. TGF $\beta$ induces different states of senescence**

(A) Multinucleated cells are prevalent in TGF $\beta$ -treated hypoxic cultures. The  $\beta$ -gal-high cells collected from TGF $\beta$ -treated (5 ng/ml, 15 days) hypoxic TE4 cells were stained with DAPI (red) and tubulin (green). Untreated cells were used as control. Photomicrographs of cells under each condition are shown. Right most panel shows higher magnification images of the binucleated and multinucleated cells within the highlighted panel. Scale bars: 50 $\mu$ M (low magnification) and 20 $\mu$ M (high magnification). Representative data from two biological replicates.

(B) Bar graphs show quantification of the binucleated and multinucleated cells in TGF $\beta$ -treated (5 ng/ml, 15 days) hypoxic TE4 cultures. Untreated cells are shown as controls.

n=3 biological replicates. Mean $\pm$ SD was calculated from imaging 10 random fields. Asterisk represents p<0.05 by two-tailed unpaired Student's t -test.

(C) The  $\beta$ -gal-high cells collected from TGF $\beta$ -treated (5 ng/ml, 3 days) hypoxic HepG2 cells were stained with DAPI (red) and tubulin (green). Untreated cells were used as control. Photomicrographs of cells under each condition are shown. Right most panel: higher magnification images of the binucleated and multinucleated cells within the highlighted panels. Scale bars: 50 $\mu$ M (low magnification) and 20 $\mu$ M (high magnification). Representative data from two biological replicates.

(D) Bar graphs show quantification of binucleated and multinucleated cells in TGF $\beta$ -treated (5 ng/ml, 3 days) hypoxic HepG2 cultures. Untreated cells are shown as controls. n=3 biological replicates. Mean $\pm$ SD was calculated by imaging 10 random fields. Asterisk represents p<0.05 by two-tailed unpaired Student's t-test.

(E) Bar graph shows the concentration of TGF $\beta$  produced by patient-derived lung CAFs *in vitro* as determined using ELISA assays (n=3 biological replicates). The regular RPMI culture medium used to grow CAFs is shown as control.

(F) TGF $\beta$  from lung cancer patient-derived cancer associate fibroblasts (CAF) induces senescence. A549 cells (mCherry labelled) were cultured with two different lung cancer patient-derived CAFs for 15 days with or without the TGF $\beta$  inhibitor, SB431542 (2  $\mu$ M; TGF $\beta$ -I). mCherry labelled A549 cells alone treated with TGF $\beta$  (5 ng/ml, 15 days) in the presence and absence of TGF $\beta$ -I were used as controls. All cultures were maintained under hypoxia (n=3 biological replicates). At the end of the experiment, cells were stained with  $\beta$ -gal and the tumor cells were sorted based on mCherry-positivity. The bar

graph shows the percentage of (Mean $\pm$ SD)  $\beta$ -gal positive and mCherry positive tumor cells. Asterisks represent  $p < 0.05$  by two-tailed unpaired Student's t-test.

(G) mCherry labelled A549 cells cultured with patient-derived CAFs for 15 days were stained with  $\beta$ -gal and the tumor cells were sorted based on mCherry-positivity. The  $\beta$ -gal high population was stained with DAPI, and tubulin and the fraction of multinucleated cells was quantified. mCherry labelled A549 cells alone untreated or treated with TGF $\beta$  (5ng/ml) for 15 days and similarly analyzed are shown as control. All cultures were maintained under hypoxia (n=3 biological replicates). Bar graph shows the fraction of multinucleated cells (Mean $\pm$ SD) under each condition. Asterisks represent  $p < 0.05$  by two-tailed unpaired Student's t test. n=3 biological replicates.

(H) TGF $\beta$ -treated  $\beta$ -gal high hypoxic cells are resistant to drug treatment. The  $\beta$ -gal-low and  $\beta$ -gal-high populations collected from 5ng/ml TGF $\beta$ -treated hypoxic and normoxic A549 cells were cultured for a day in the absence of TGF $\beta$  and treated with increasing concentrations of cisplatin for 72 hours. The graph shows the relative viability of the cells for each condition (y-axis) under different drug concentrations (x-axis). Untreated cells for each condition [TGF $\beta$  (-)] are shown as controls. Asterisks represent  $p < 0.05$  by two-tailed unpaired Student's t-test. Representative data from three biological replicates.

### **Figure S3. Analysis of gene expression differences in E- and D-senescent cells**

(A) Analysis of RNA-Seq data from D- and E- senescent cells demonstrates the suppression of gene expression modules representing cell cycle, DNA replication, DNA damage responses and paracrine senescence signatures (Figure 2A). The heatmap displays leading-edge genes relating to each of the processes shown. n=3 biological replicates. The scale bar

represents the differential expression. T-statistic significant gene sets were defined using an FDR threshold of 0.25. The heatmap rows are sorted based on their GSEA enrichment FDR values from most significant (FDR=3.69e-05) to least significant (FDR=0.217).

(B) The dosage of repressor E2Fs does not change in D-sen cells compared with E-sen cells. The expression of the repressor E2Fs, E2F4, E2F5, E2F6 and E2F7, in untreated A549 cells grown under normoxia and hypoxia, E-sen and D-sen cells is shown. n=3 biological replicates. p values for E2F4, E2F5, E2F6, and E2F7 are 0.12, 0.27, 0.19, and 0.069 respectively, using Kruskal-Wallis test.

(C) TGF $\beta$  suppresses the expression of activating E2Fs, E2F1 and E2F2, in hypoxic HepG2 and TE4 cells. n=3 (biological replicates). Data are represented as mean $\pm$ SD; Asterisks represent p<0.05 by two-tailed unpaired Student's t-test.

**Figure S4. Lung cancers with elevated expression of the 14-gene SASP exhibit increased immune cell infiltration**

(A) Volcano plot showing differential expression of cytokines in D-sen and E-sen cells. n=3 biological replicates for each condition. Significantly different cytokines were selected based on Benjamini-Hochberg corrected p-value < 10% and > 2-fold differences in gene expression.

(B) Expression of the 14-gene SASP panel in E-senescent (upper panel) and D-senescent (lower panel) A549 cells. The y-axis represents log<sub>2</sub> fold change over untreated A549 cells grown under normoxia (upper panel) or hypoxia (lower panel). n=3 (biological replicates); The 14 cytokines shown in Figure 4A represent those significantly elevated in D-senescent cells compared with E-senescent cells shown in the volcano plot in Figure S4A. They were

selected based on a Benjamini-Hochberg corrected p-value  $< 10\%$  and  $> 2$ -fold differences in gene expression.

(C) Western blot showing that mTOR activity, as measured by phospho-6 and phospho-4EBP1 expression, is suppressed by TGF $\beta$  (5ng/ml for 15 days) in both normoxic and hypoxic A549 cells compared with untreated cells. pAKT expression in these samples is also shown. GAPDH is provided as control.

(D) Box plots showing that the fraction of myofibroblasts (top) and tumor-derived endothelial cells (bottom; Tumor ECs) (normalized to the number of cancer cells in each sample) are not significantly different across the 14-gene high and 14-gene low lung cancers.

(E) Box plots showing that the fraction of immune cell subtypes shown (normalized to the number of cancer cells in each sample) are significantly higher in lung cancers with a higher fraction of tumor cells expressing high levels of the 14-gene SASP. P values were calculated using two-sample two-sided Wilcoxon test.

**Figure S5. The 14-gene high lung cancers exhibit an immune suppressive microenvironment**

(A) The 14-gene high lung cancers exhibit an immune suppressive microenvironment. The plots show the ratios of Tregs : exhausted cytotoxic CD8+ T cells and exhausted CD8+T cells : cytotoxic CD8+ T cells (top) and the ratios of NK cells: monocytic macrophages (mo-macs) and cytotoxic CD8+T cells: monocytic macrophages (mo-macs) (bottom) resident within lung cancers harboring a high fraction of 14-gene high cancer cells.  $p < 0.05$  was calculated using the one-sample two-sided Wilcoxon test applied to  $(\log(x) - \log(y))$ .

(B) Mo-Macs in the 14 cytokine high lung cancers express significantly higher levels of TGF $\beta$ 1. Box plots showing TGF $\beta$ 1 expression in Mo-Macs and myofibroblasts residing in lung cancers with a high and low fraction of tumor cells expressing high and low levels of the 14-gene SASP. P values were calculated using the two-sample two-sided Wilcoxon test.

**Figure S6. Lung cancers with high 14-gene SASP expression exhibit adverse clinical outcome**

(A) Lung cancers from the publicly available TCGA dataset were characterized based on the expression of the 14-gene SASP. High expression of the 14-gene SASP correlates with adverse clinical outcome by the Cox proportional hazards model applied to relapse-free survival (Log-Rank p = 0.064).

(B) RNA-sequencing data was generated from tumor samples collected from metastatic lung cancer patients prior to initiating immune checkpoint therapy. Cox proportional hazards model applied to the data shows that high expression of the 14-gene SASP in pre-treatment samples trends towards poor progression-free survival (PFS) during the entire follow-up period (mean:316 days; range: 4-1039 days, Log Rank p = 0.065).

**Figure S7. Growth characteristics of TGF $\beta$ R2-KD Lewis lung carcinoma cells**

(A) TGF $\beta$  induces senescence in LLC cells *in vitro*. (Left panel) LLC cells were treated with 5ng/ml TGF $\beta$  for 15 days and stained for  $\beta$ -gal activity. Photomicrographs of untreated and TGF $\beta$ -treated cells stained with  $\beta$ -gal. Scale bar: 20 $\mu$ m. (Right panel) Bar graph shows the quantification of the percentage of  $\beta$ -gal positive cells. Mean $\pm$ SD was calculated from



imaging 4 random fields. Asterisk represents  $p < 0.05$  by two-tailed unpaired Student's t-test.  $n = 3$  biological replicates.

(B) Western blot showing reduced TGF $\beta$ -induced p-Smad3 levels in TGF $\beta$ R2-KD LLC1 cells compared with shControl LLC1 cells. Total Smad3 expression is shown as control.

(C) TGF $\beta$ R2-KD does not impair LLC1 growth *in vitro*. TGF $\beta$ R2 expression in LLC1 was knocked down using shRNA. Relative growth of shControl and TGF $\beta$ R2-KD LLC1 *in vitro* is shown.  $n = 3$  biological replicates. Each point represents Mean $\pm$ SD. n.s.: not significant.

(D) The raw intensity histogram of  $\beta$ -gal stain counts shows that the intensity of the  $\beta$ -gal signal significantly shifts from strong to weak in the control-to TGF $\beta$ R2-KD tumors, respectively.  $n = 5$  tumors/condition.

(E) p21 staining shows that p21 positive cells significantly decline in shTGF $\beta$ R2 tumors compared to the control tumors. Left panel shows the photomicrographs of p21 stained shControl and shTGF $\beta$ R2 tumors. Scale bar: 50 $\mu$ m. Right panel shows quantification of the percentage of p21 positive cells. Mean $\pm$ SD was calculated from imaging 5 tumors. Asterisk represents  $p < 0.0001$  by two-tailed unpaired Student's t-test.

(F) TGF $\beta$ R2-KD in tumors trends towards a reduction in the ratio of Treg:NK cells compared with shControl tumors.  $n = 5$  tumors for each condition.  $p = 0.055$  calculated by two-tailed unpaired student's t-test.

(G) Staining for Granzyme B, a marker of cytotoxic lymphocytes<sup>51</sup>, shows a significant decline in shTGF $\beta$ R2 tumors compared with control tumors. Scale bar represents 50 $\mu$ m.  $p < 0.001$  calculated by two-tailed unpaired student's t-test.  $n = 4$  tumors/condition.

# Figure S1

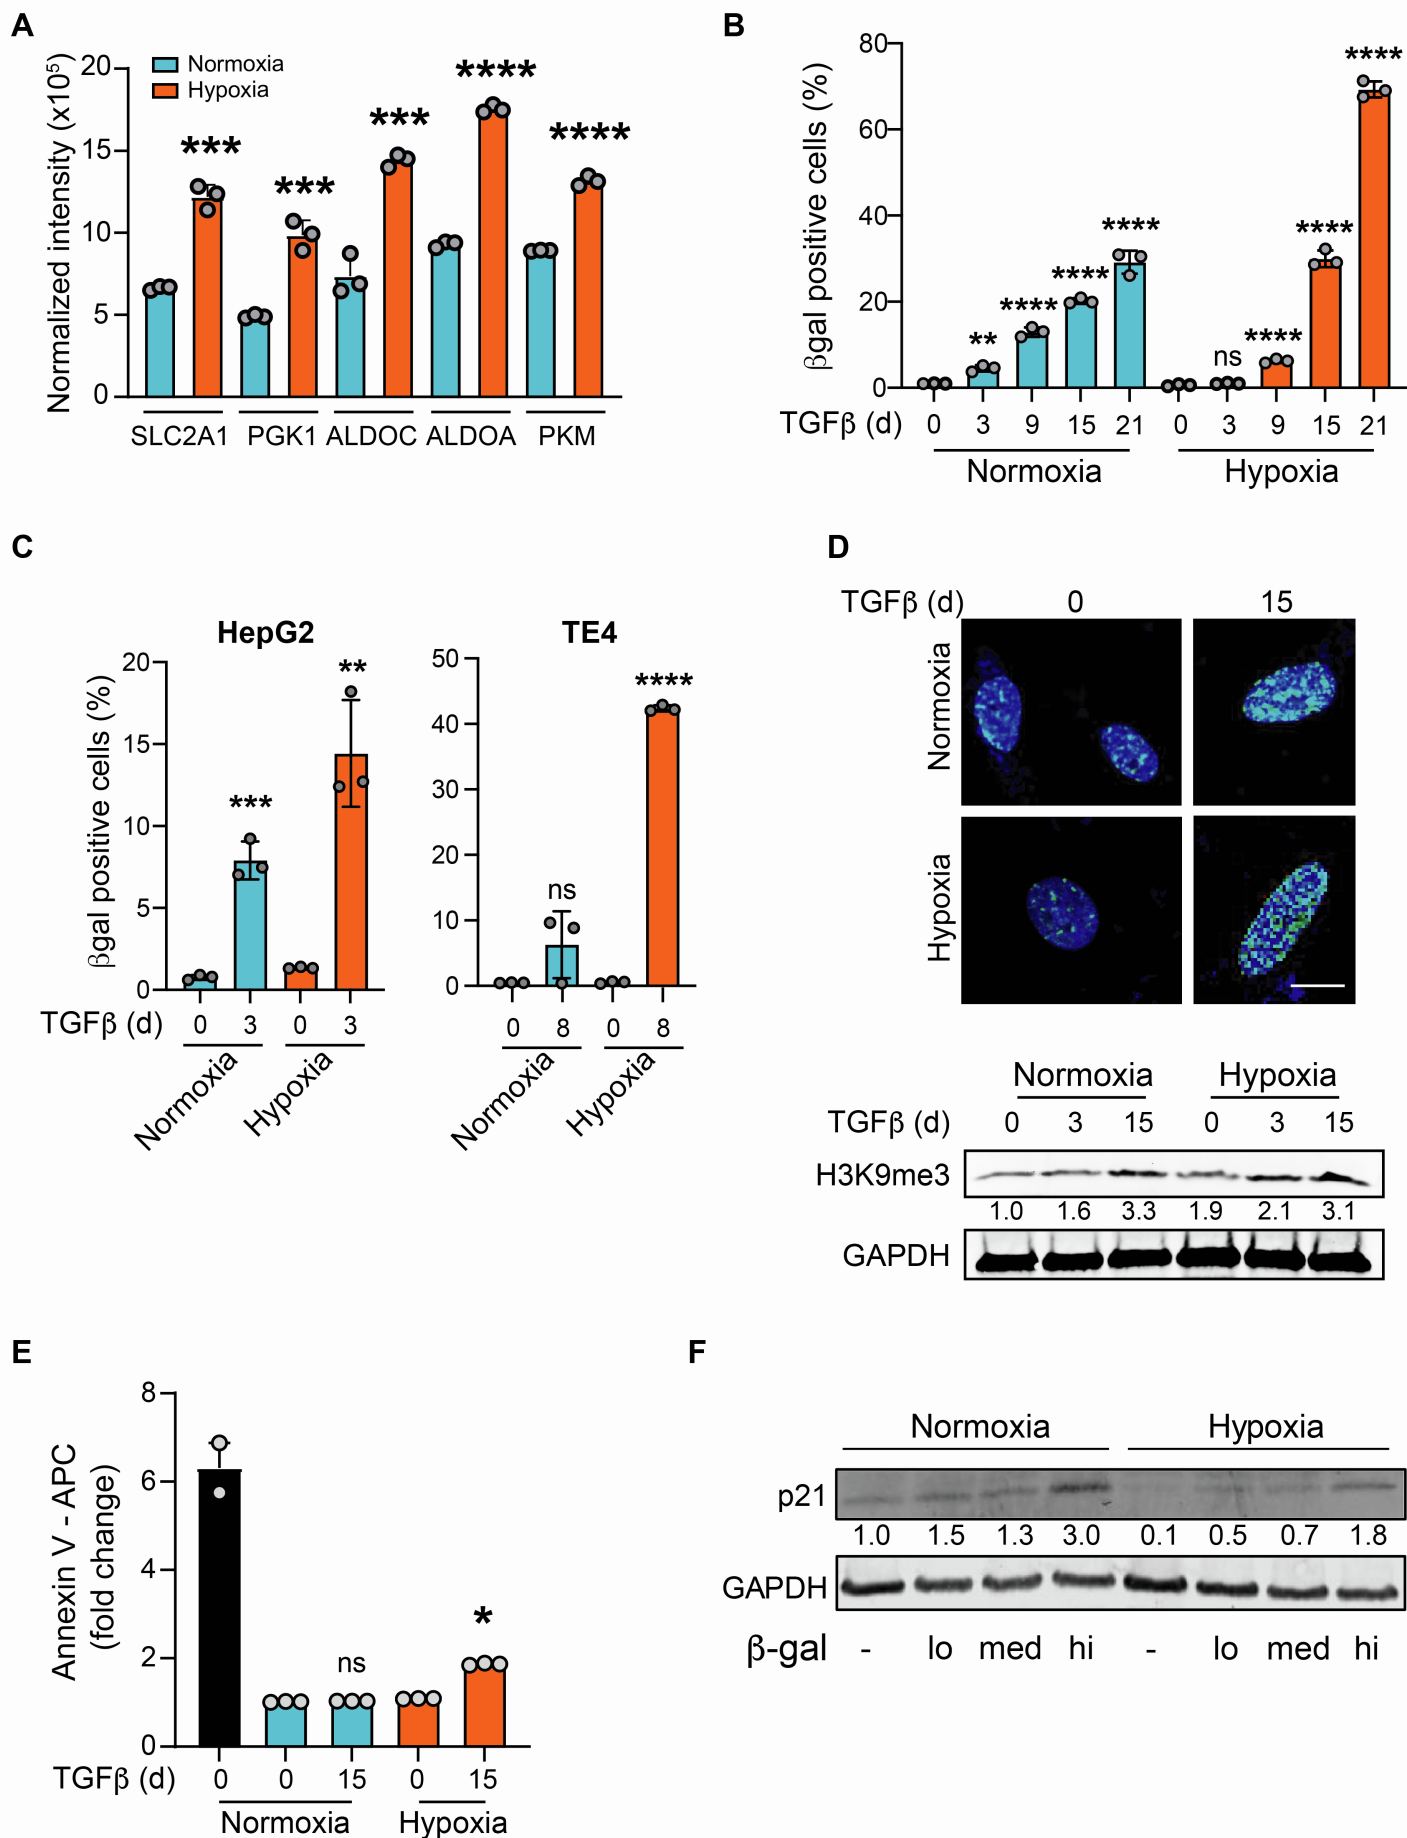

**Figure S2**

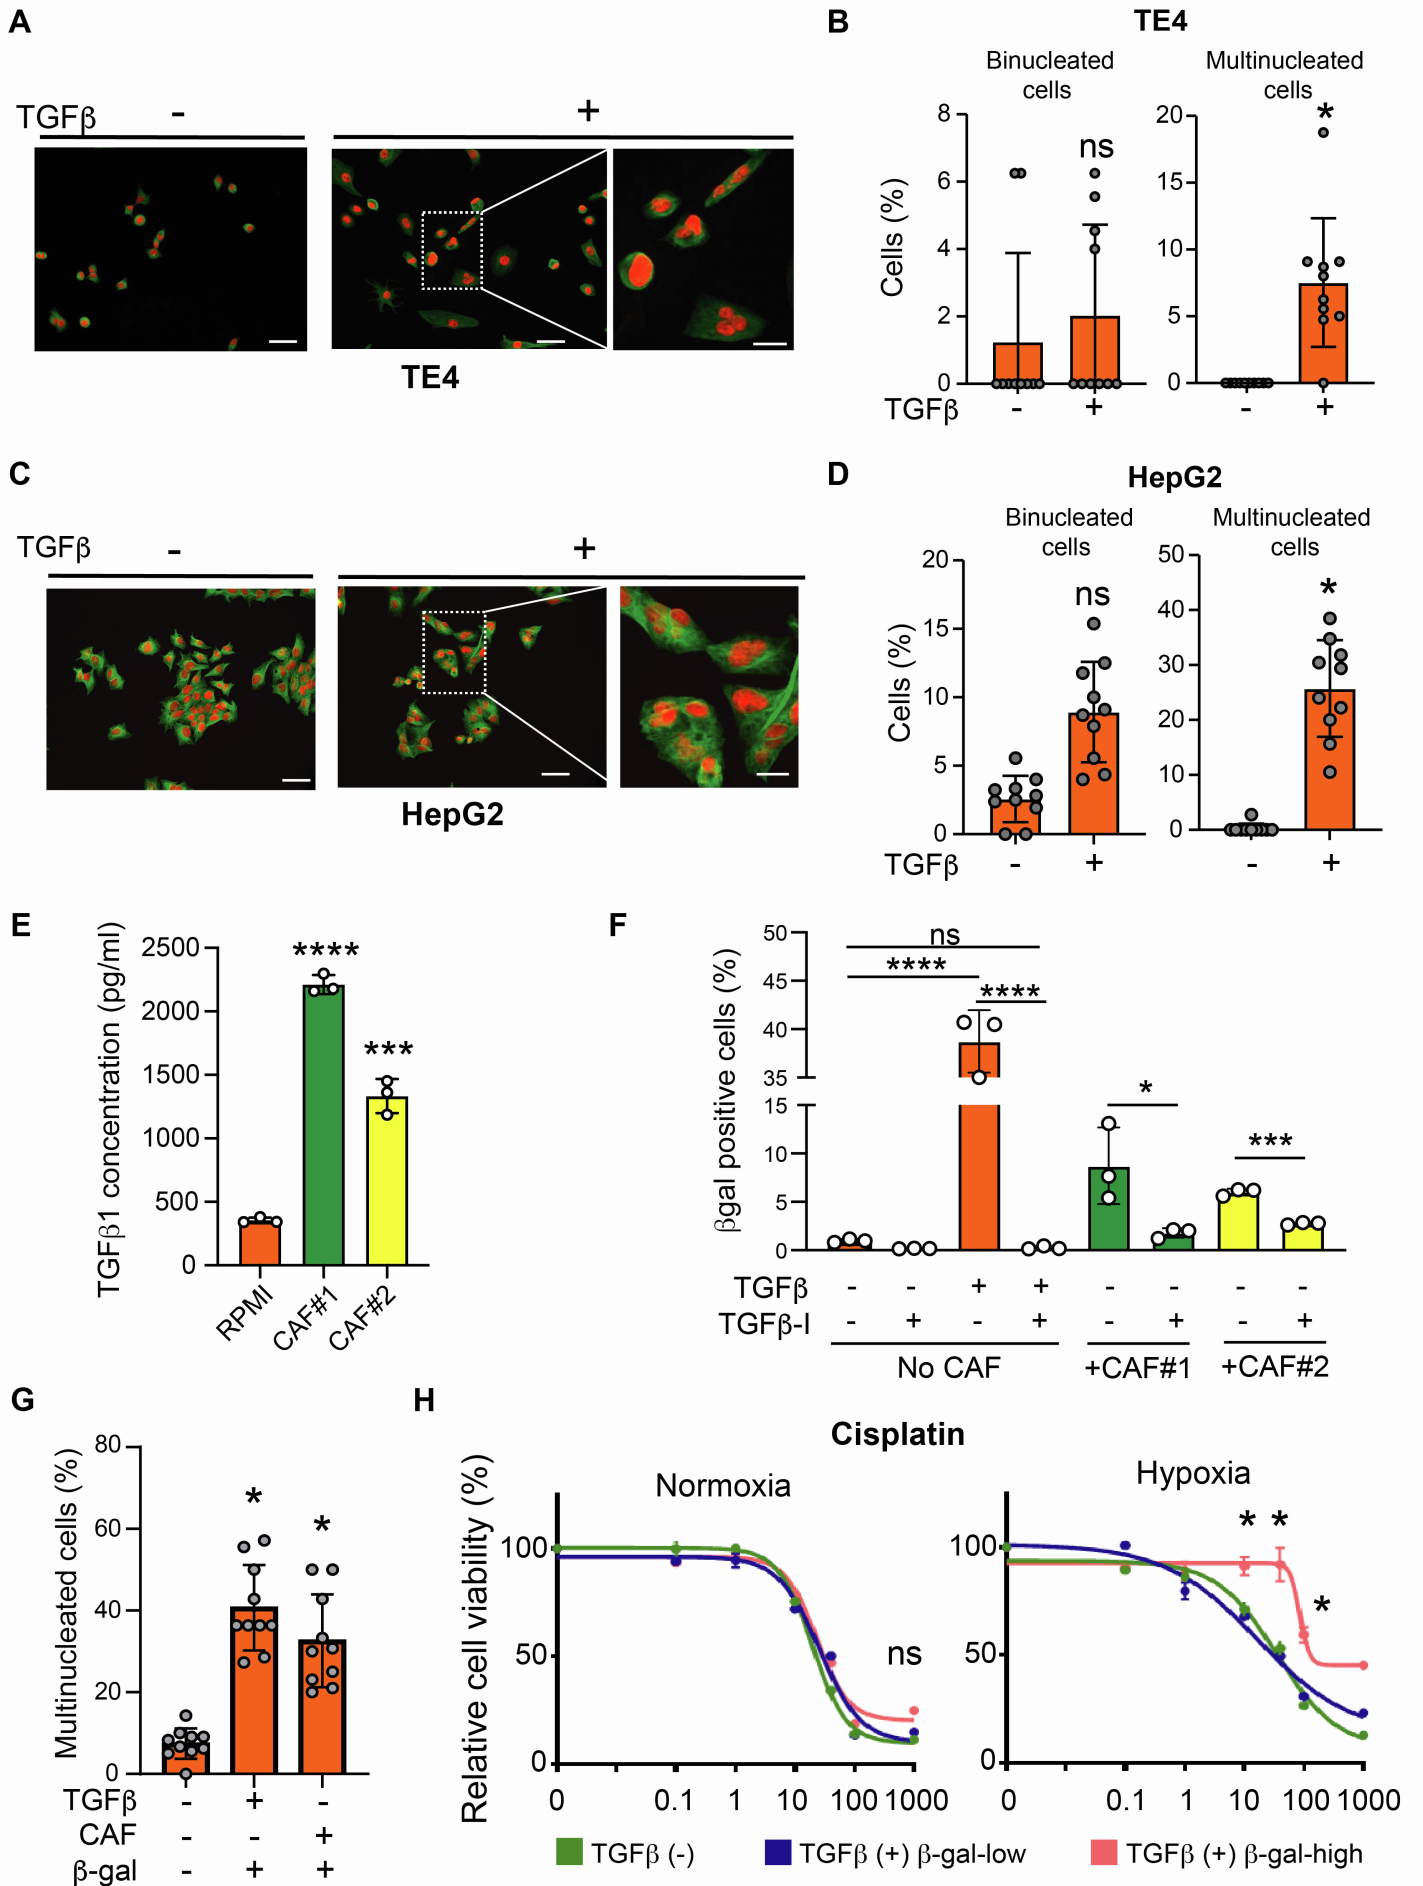

Figure S3

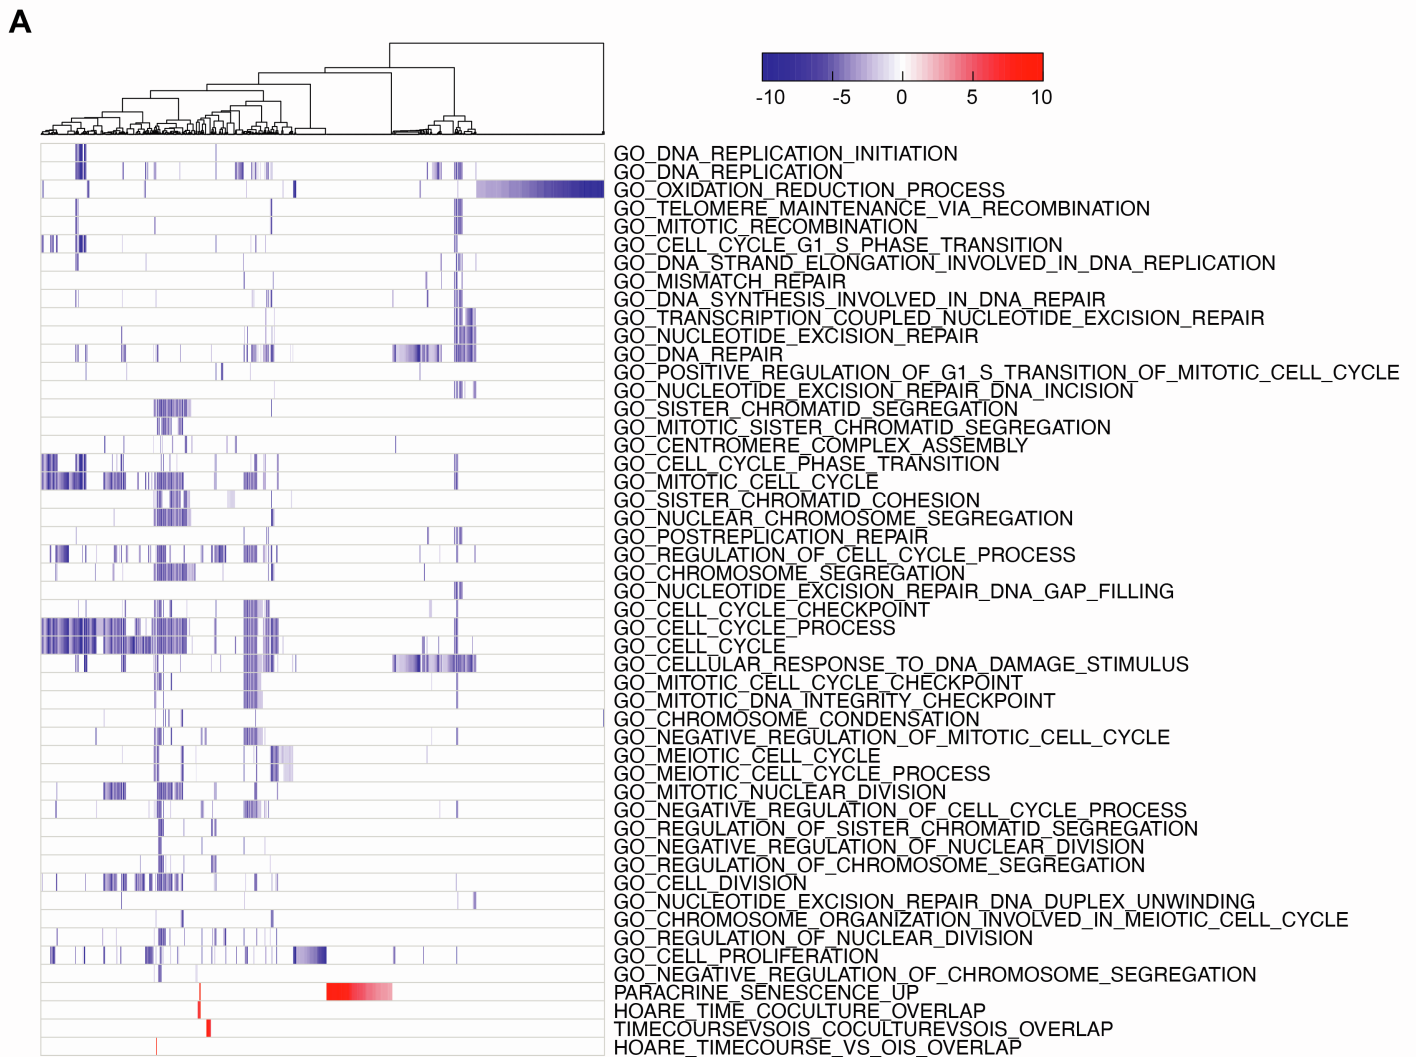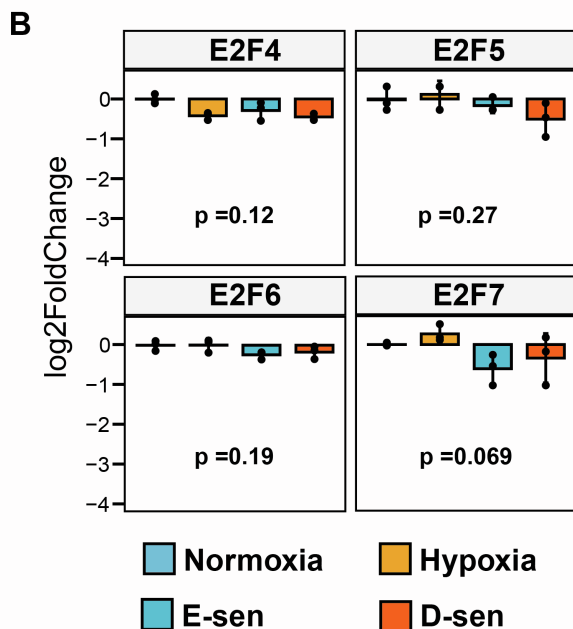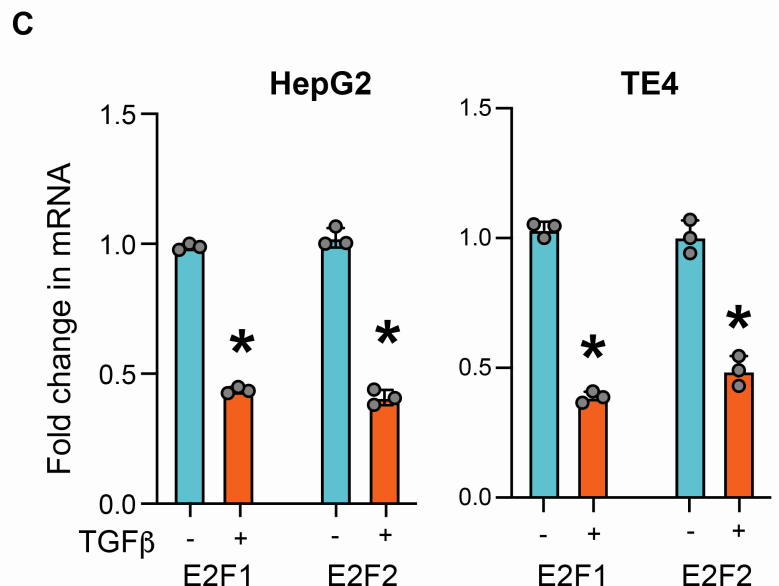

**Figure S4**

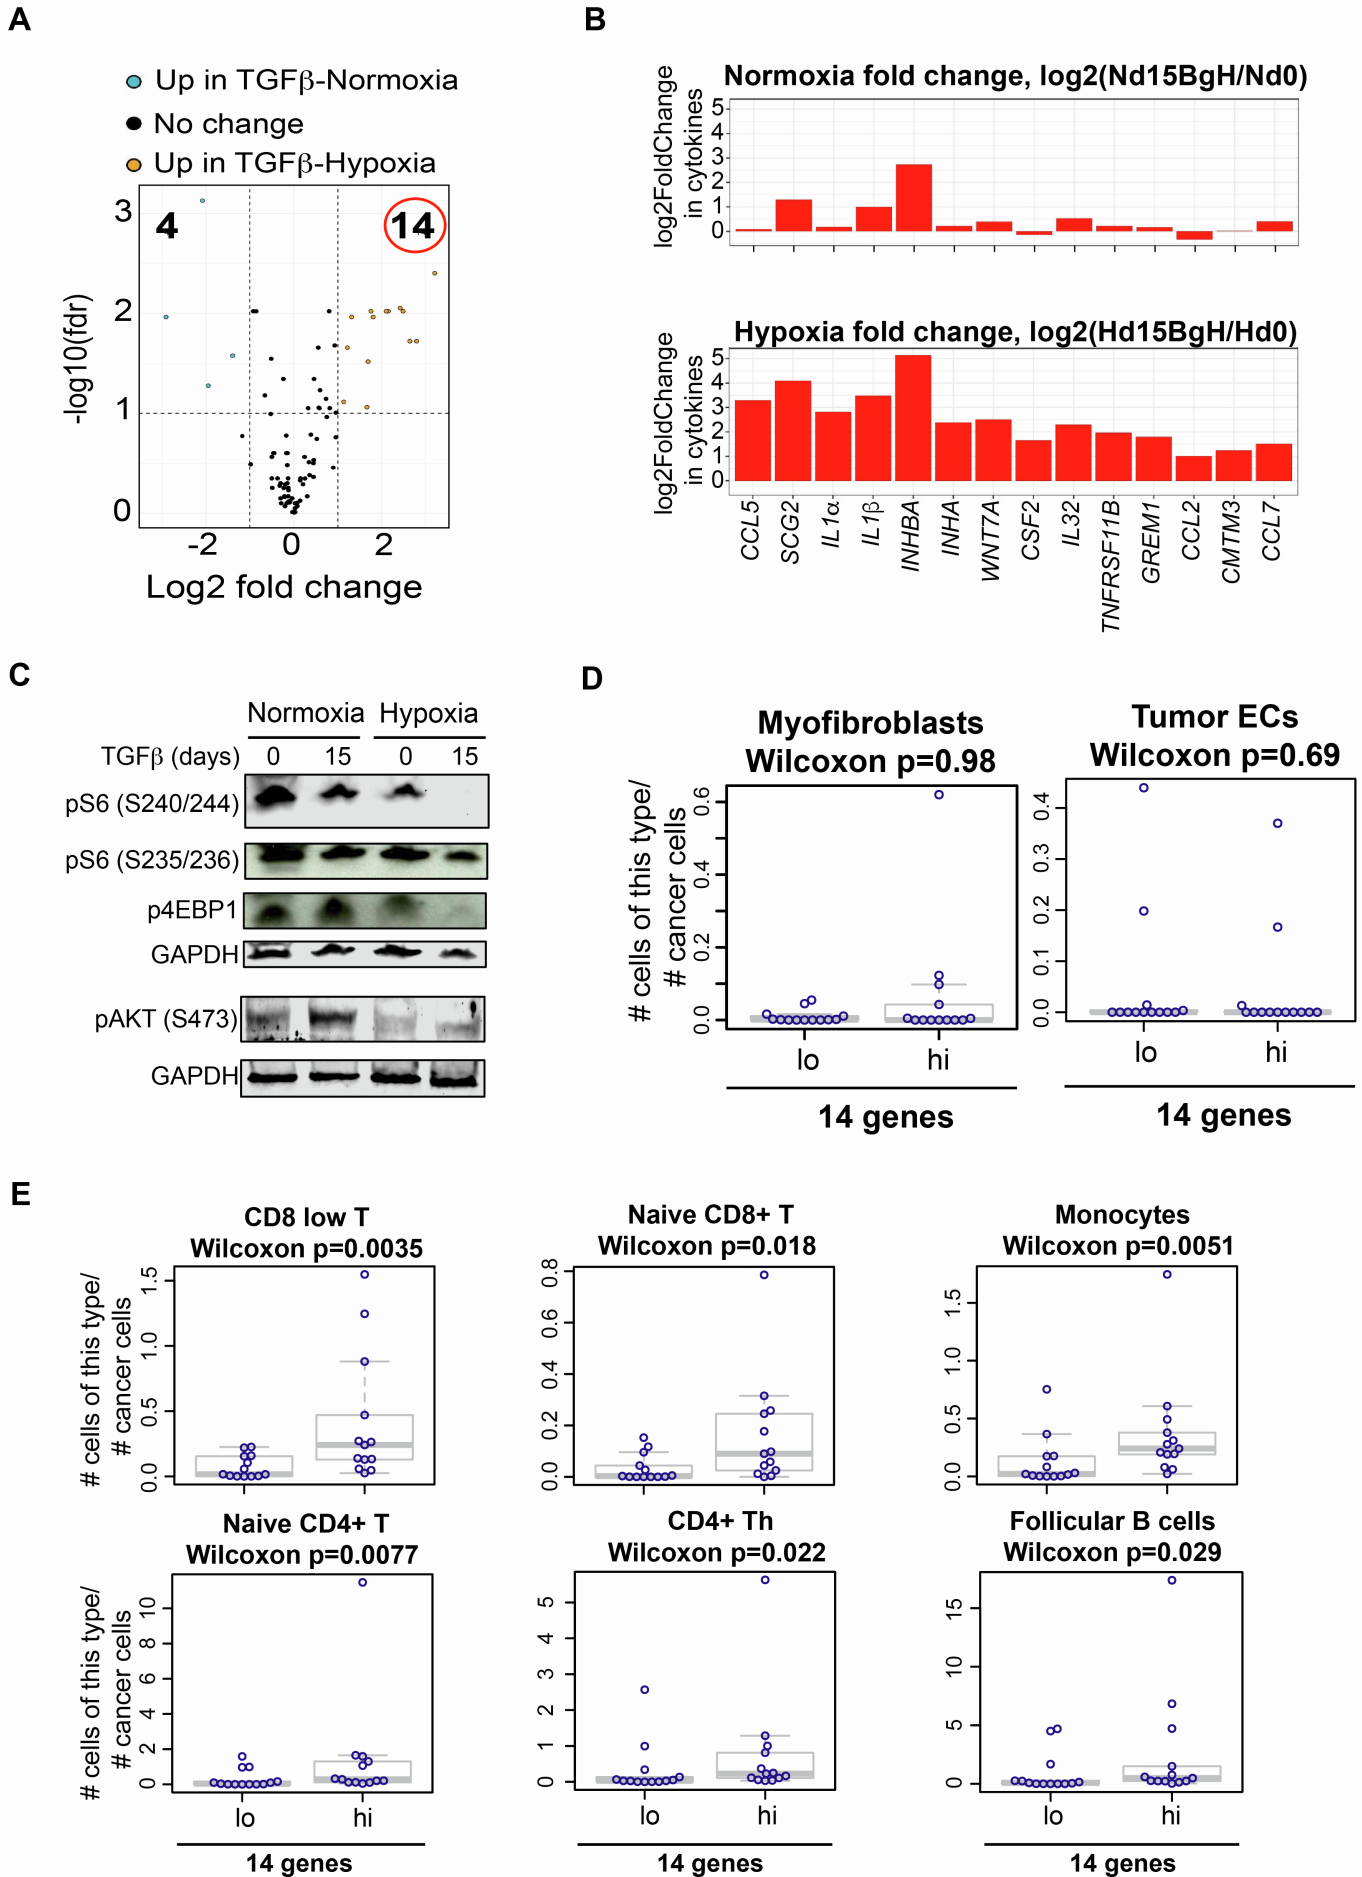

**Figure S5**

**A**

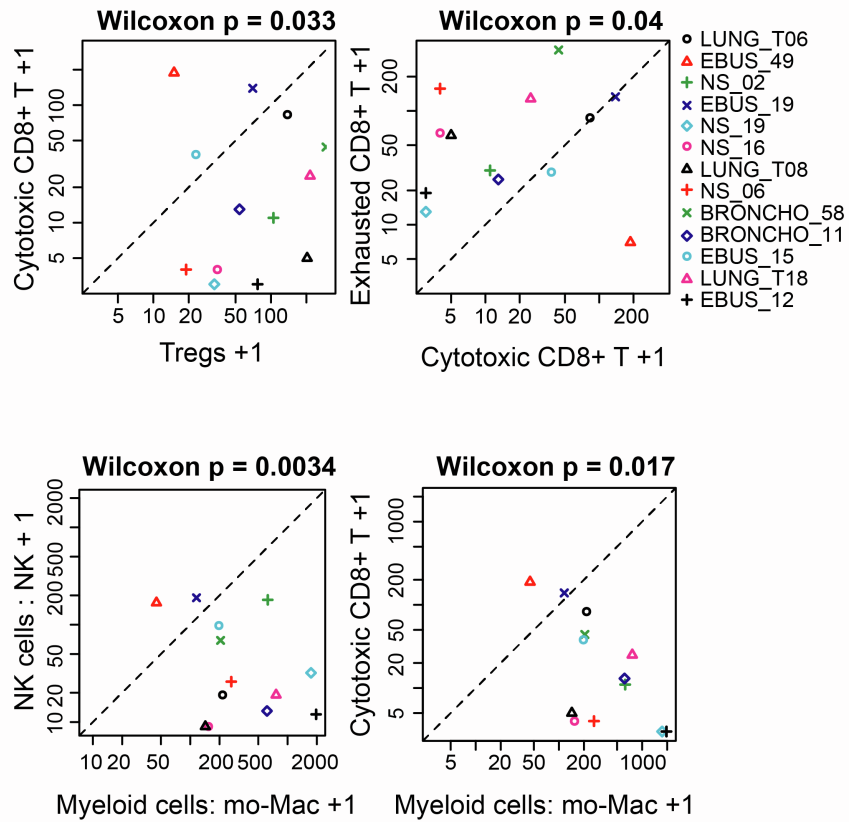

**B**

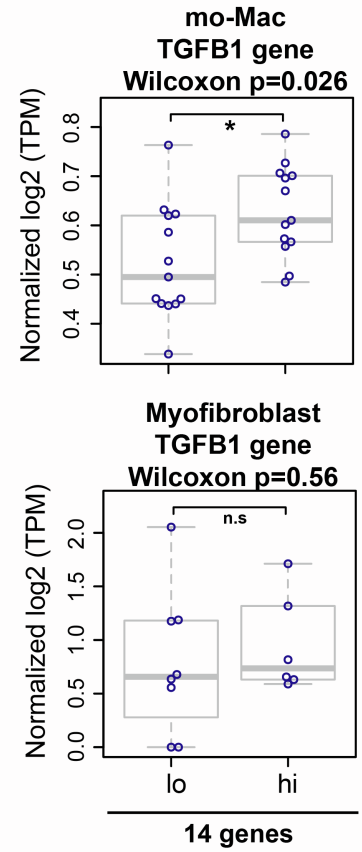

**Figure S6**

**A**

**LUAD-TCGA**  
**Relapse-Free Survival**  
**(log-rank p=0.063)**

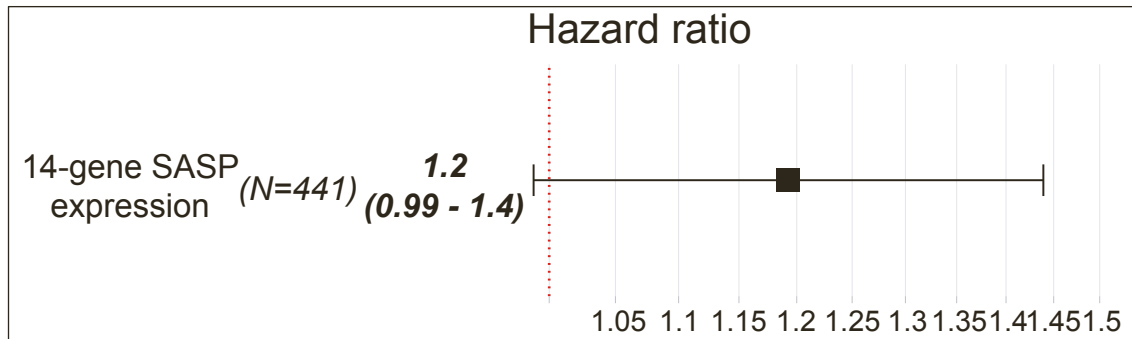

# Events: 151; Global p-value (Log-Rank): 0.0635  
AIC: 1581.98; Concordance Index: 0.56

**B**

**NSCLC immune checkpoint inhibitor therapy**

**Progression-free Survival**  
**(mean:316 days; range 4-1039 days)**  
**(log-rank p=0.065)**

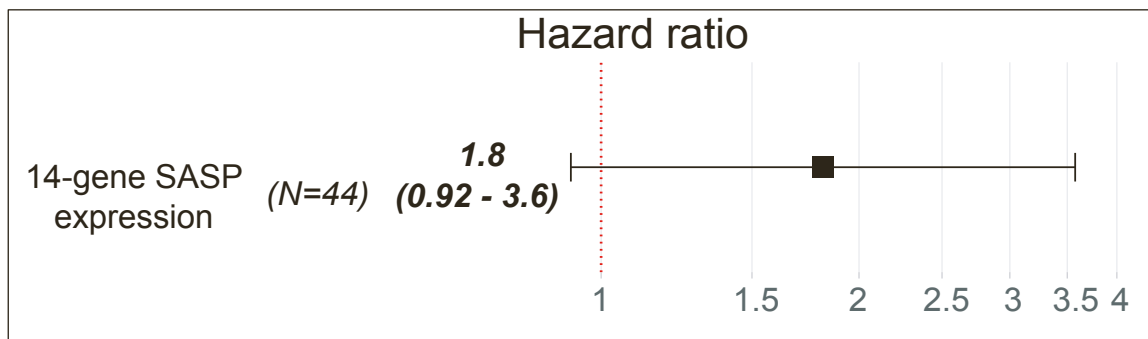

# Events: 26; Global p-value (Log-Rank): 0.065442  
AIC: 159.94; Concordance Index: 0.61



**Figure S7**

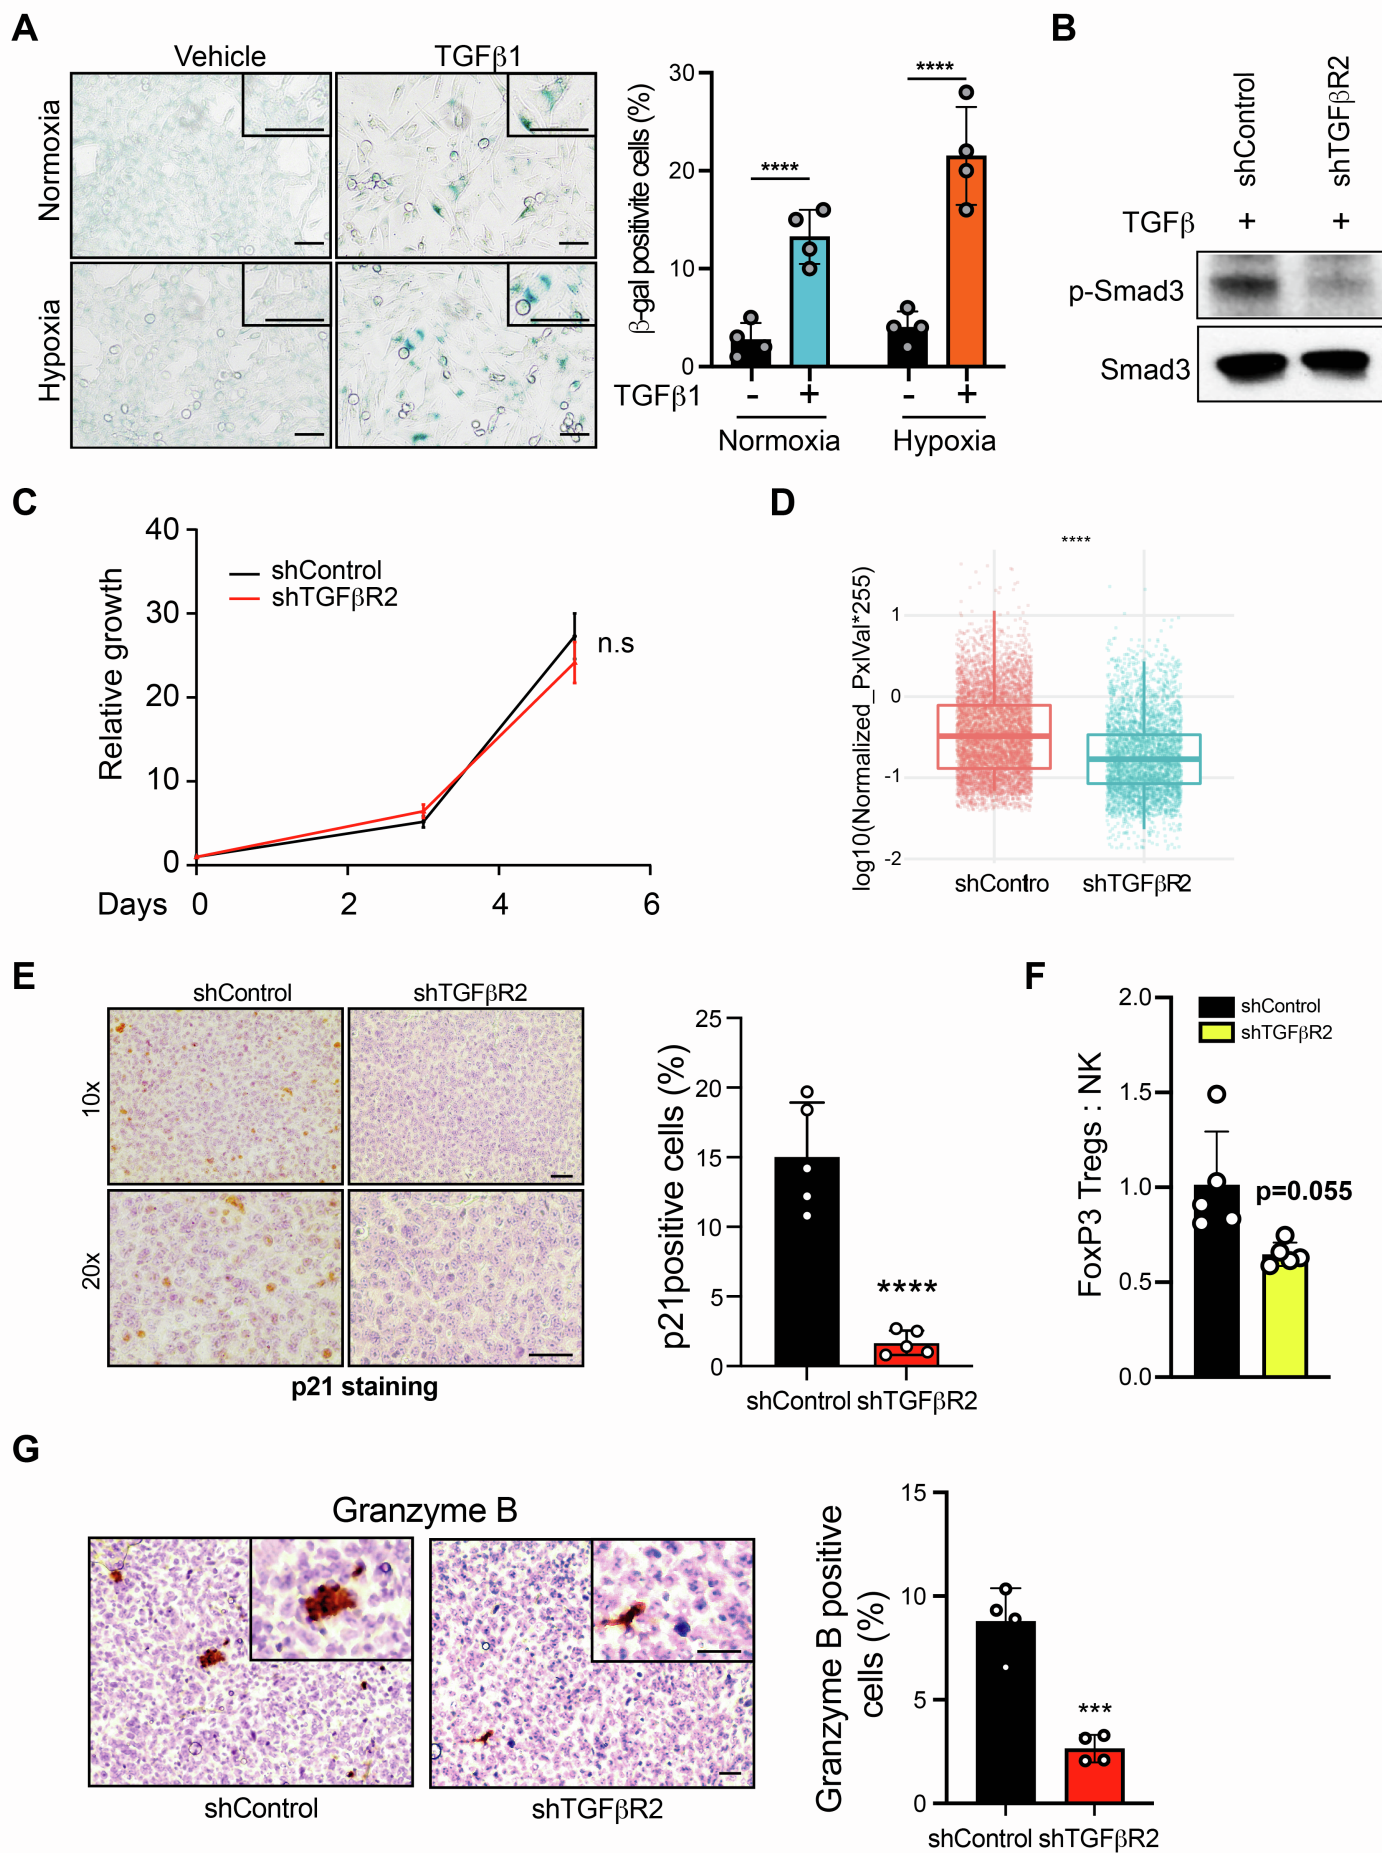

Supplement: NIHMS1887262-supplement-1.pdf [file NIHMS1887262-supplement-1.pdf]
